# Supplementary material for: Identification of genes associated with dissociation of cognitive performance and neuropathological burden: Multistep analysis of genetic, epigenetic, and transcriptional data
Source: PLoS Med. 2017 Apr 25;14(4):e1002287. doi: 10.1371/journal.pmed.1002287 (PMC5404753; doi:10.1371/journal.pmed.1002287)
Supplement: S3 Table — (DOCX) [file pmed.1002287.s003.docx]

**S3 Table. SNPs With Suggestive Associations with Residual Cognition (p<1.0×10-5)**

Estimated effect indicates change in residual cognition, as measured by z-score, per each additional minor allele of each SNP.

CHR, chromosome; SNP, single nucleotide polymorphism.
